# Supplementary material for: Emotional Responses And Perceived Stressors Of Frontline Medical Staffs In Case Of Addis Ababa Covid-19 Treatment Centers And Obstetrics Emergency And Abortion Care Clinic, Ethiopia; Analytical Cross Sectional Study
Source: Research Square preprint supplement (doi:10.21203/rs.3.rs-107059/v1), 2020-12-02
Supplement: Supplementary file 2 [file 5b12d9d675c6381fc192279d.docx]

**Informed consent**

**Title:** The current state of Emotional Responses, Perceived Stressors and Coping strategies of Frontline Medical Staffs in case of Addis Ababa COVID-19 Treatment Centers and obstetrics emergency and abortion care units, Addis Ababa, Ethiopia

**Investigators:** Dereje Bayissa, Dr.Dessalegn Kenayi, Michael Temane, Zebenay Workneh and Dr. MahtemeBekele and **Mebratu Abraha**

Contact Address of PI; Tell +251912189560

**Introduction:**

Greetings, you are being asked to participate in a study assessing Investigate the current state of Emotional Responses, Perceived Stressors and Coping strategies of Frontline Medical Staffs in case of Addis Ababa COVID-19 Treatment Centers and obstetrics emergency and abortion care units, Ethiopia. The research proposal has got ethical approval by the institutional review board (IRB) of Saint Paul’s Hospital Millennium Medical college after reviewed and evaluated the proposal.

You are selected because you are evaluated in the time frame of the study and received a required diagnosis.

Please read the form

**Purpose of the study:** to Investigate the current state of Emotional Responses, Perceived Stressors and Coping strategies of Frontline Medical Staffs in case of Addis Ababa COVID-19 Treatment Center, Ethiopia

**Procedure**: If you agree to this study, you will answer question about you and your emotional Responses, Perceived Stressors, motivational factors and Coping strategies.

**Risks**: There is no anticipated risk of participation and acceptance or refusal will not affect any further care.

**Benefits:** It will help to improve emotional Responses, Perceived Stressors and Coping strategies of Frontline Medical Staffs towards COVID-19 pandemic and obstetrics emergency and abortion care unit

**Confidentiality:** The study will be anonymous, findings will be strictly confidential, and your identification will not be mentioned. All information will be kept in confidential. The researchers will be published the finding of the current study at international journals, but there will not any study participant identifying information.

**Payment**: You will not receive any payment for your participation except gratitude.

**Right to refuse or withdraw**: You can refuse any time to participate in the study and can withdraw your consent for the data gathered to be used.

A hospital counsellor is arranged for consultation if you experience any discomfort or emotional stress. You are assured that any information you share will remain strictly confidential and the contents will only be discussed between the researcher and the study supervisor and will be kept in a secure place. There will be no monetary compensation for your participation in the study but long-term benefits are for improvement of services for women.

**Consent form**

I ……………understood that I am being asked to participate in the above-mentioned study. I realise that I cannot participate in this study if I am younger than 18 years.

I realise that my participation in this study is entirely voluntary and I may withdraw from this study at any time I wish without penalty and that minimum risk is expected from my participation in this study. The study has been explained to me. I have read and understand this consent form, all of my questions have been answered and I agree to participate in the above mentioned study and I have accepted the data could be facilitated for future publication of the finding.

Signature of Respondent ………………………………. Date……………………

Signature of Witness …………………………….... Date……………………

Signature of Researcher ……………………………… Date……………………

Thank you for your time!
